# Supplementary figures and images for: Nanofat Cell Aggregates: A Nearly Constitutive Stromal Cell Inoculum for Regenerative Site-Specific Therapies
Source: PubMed Central journal article supplement — Plast Reconstr Surg. 2019 Oct 28;144(5):1079–88. doi: 10.1097/PRS.0000000000006155 (PMC6818980; doi:10.1097/prs.0000000000006155), 2019-10-28

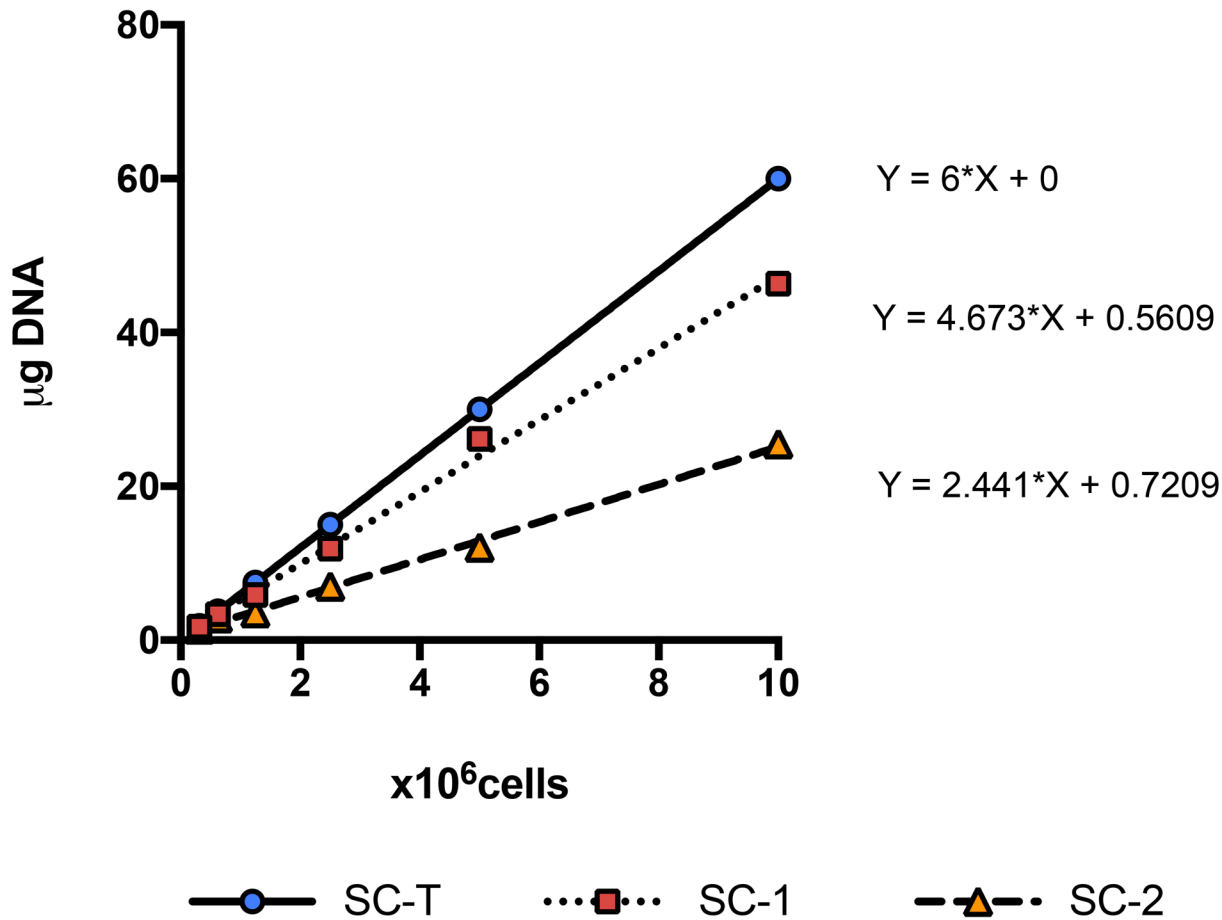

Supplement: prs-144-1079-s002.pdf [file prs-144-1079-s002.pdf]

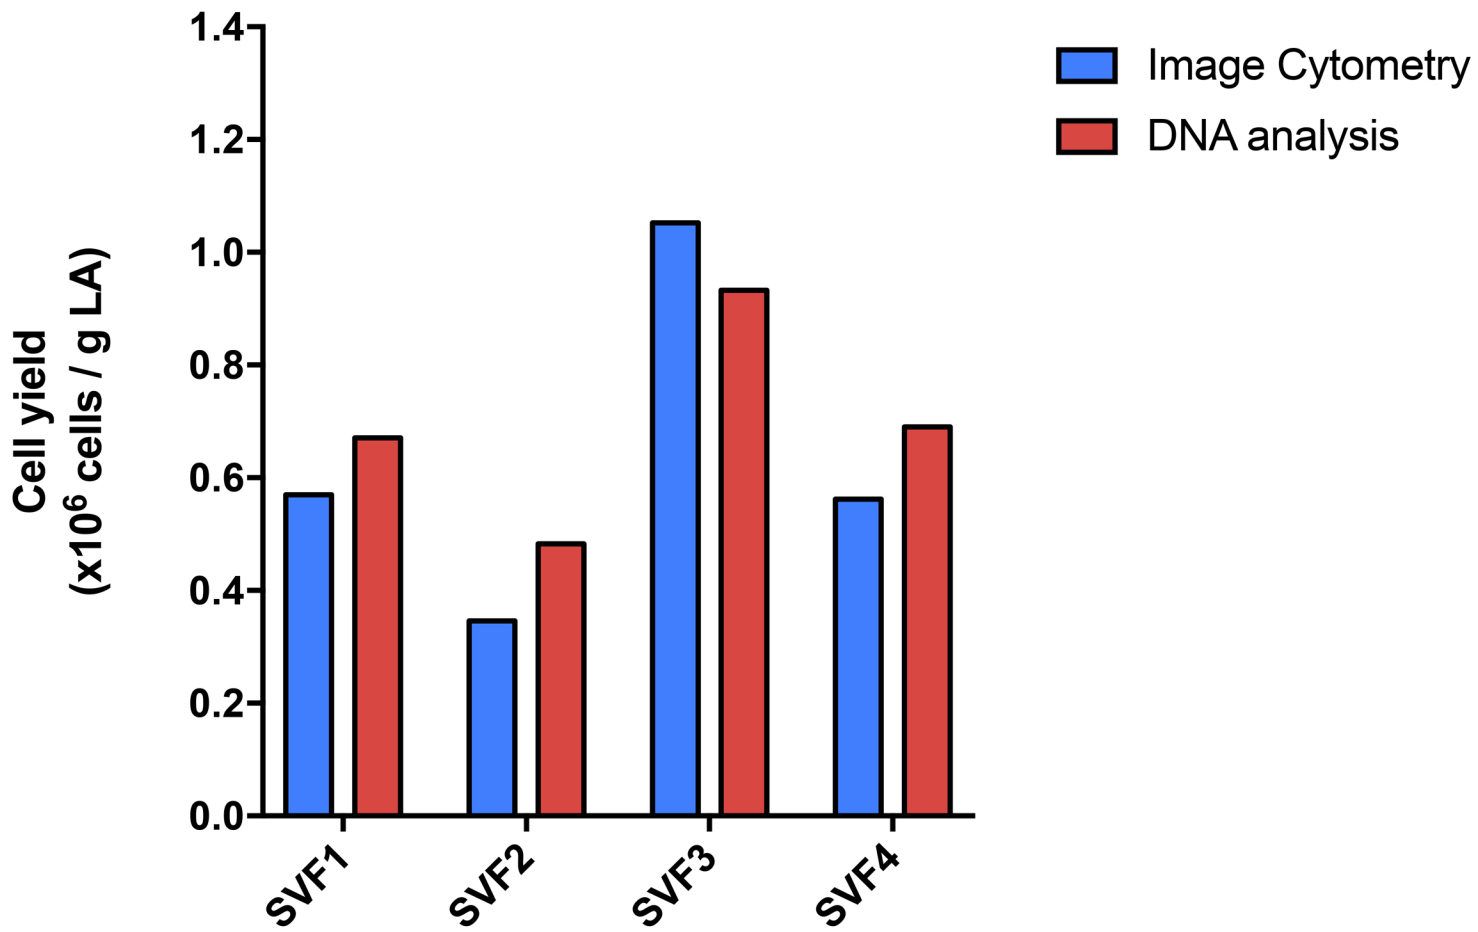

Supplement: prs-144-1079-s003.pdf [file prs-144-1079-s003.pdf]
